# Supplementary figures and images for: Analysis of oxidation degree of graphite oxide and chemical structure of corresponding reduced graphite oxide by selecting different-sized original graphite
Source: Royal Society of Chemistry journal article supplement (doi:10.1039/c8ra01486h), 2018-01-01

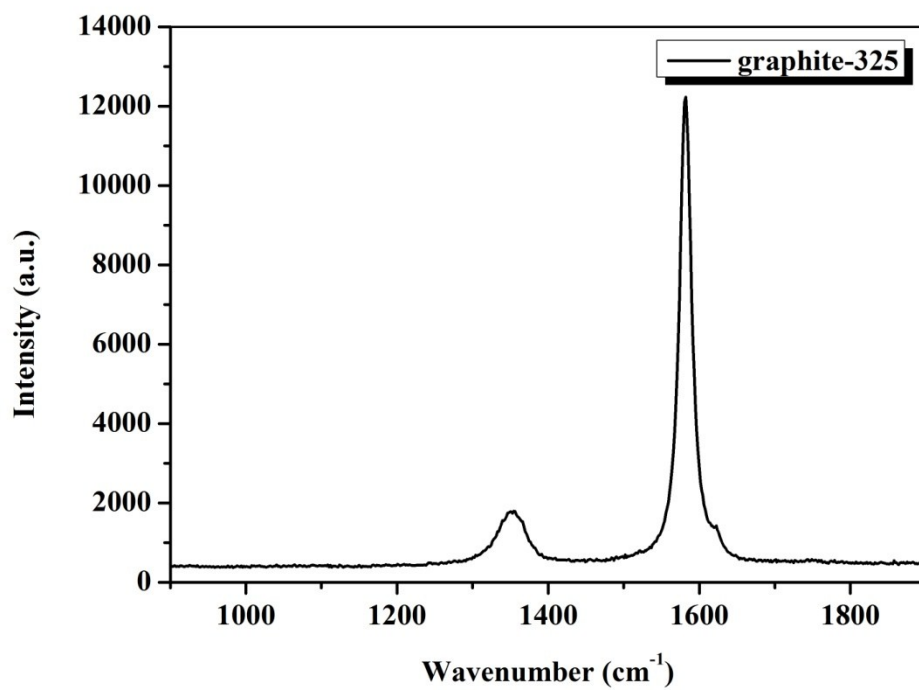

**Fig. S1** Raman spectrum of graphite-325

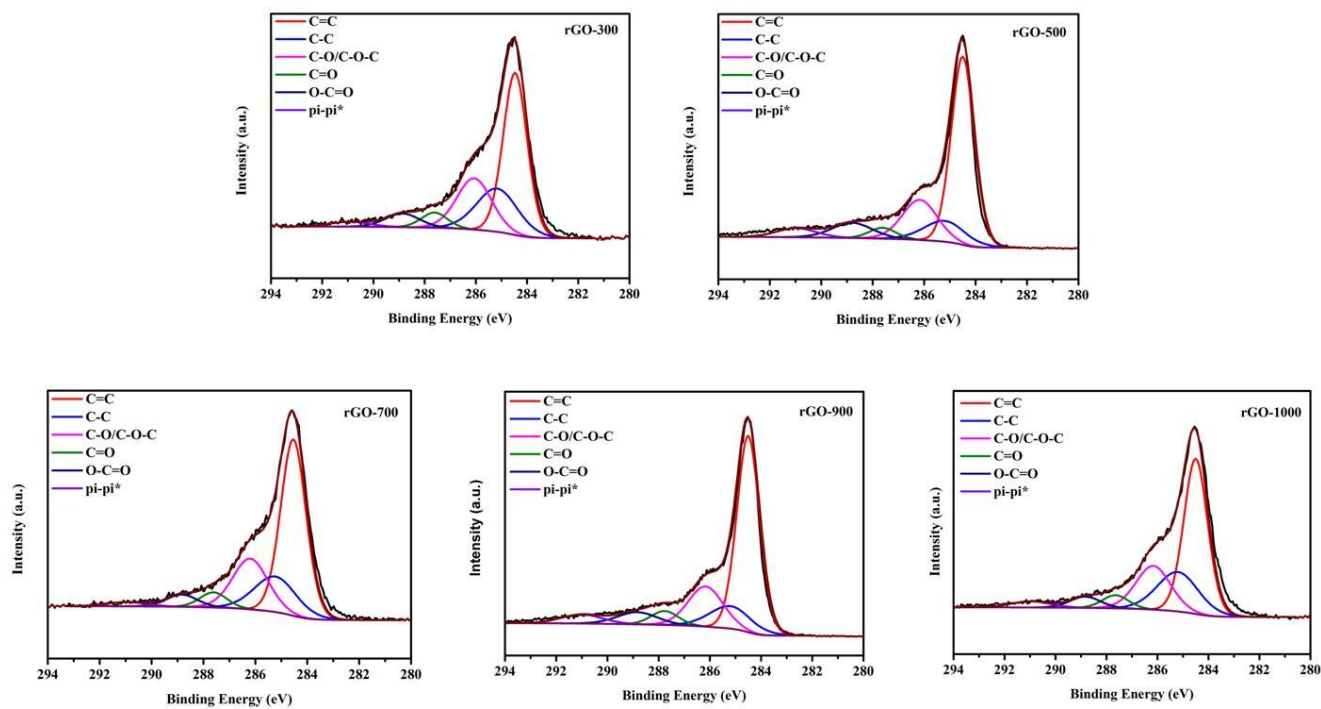

**Fig. S2** C1s spectra of (a)rGO-300, (b)rGO-500, (c)rGO-700, (d)rGO-900 and (e)rGO-1000.

Supplement: c8ra01486h1.pdf [file c8ra01486h1.pdf]
